# Supplementary material for: Translational regulation contributes to the secretory response of chondrocytic cells following exposure to interleukin-1β
Source: PubMed Central journal article supplement (PMC6721953; doi:10.1074/jbc.ra118.006865), 2019-07-12
Supplement: supp_RA118.006865_142182_1_supp_345305_psvhz8.pdf [file supp_RA118.006865_142182_1_supp_345305_psvhz8.pdf]

Translational regulation contributes to the secretory response of chondrocytic cells following exposure to Interleukin-1 $\beta$

**Benjamin T McDermott<sup>1</sup>, Mandy J Peffers<sup>1</sup>, Brian McDonagh<sup>2</sup> and Simon R Tew<sup>1</sup>**

Supporting Information

Figure S1: Extended ribosome profiling workflow detailing steps that were performed on the RiboGalaxy platform.

Figure S2: SW1353 STRING analysis of ribosome profiling transcripts.

Figure S3: SW1353 STRING analysis of secretome data.

Figure S4: SW1353 STRING analysis of cellular proteomic data.

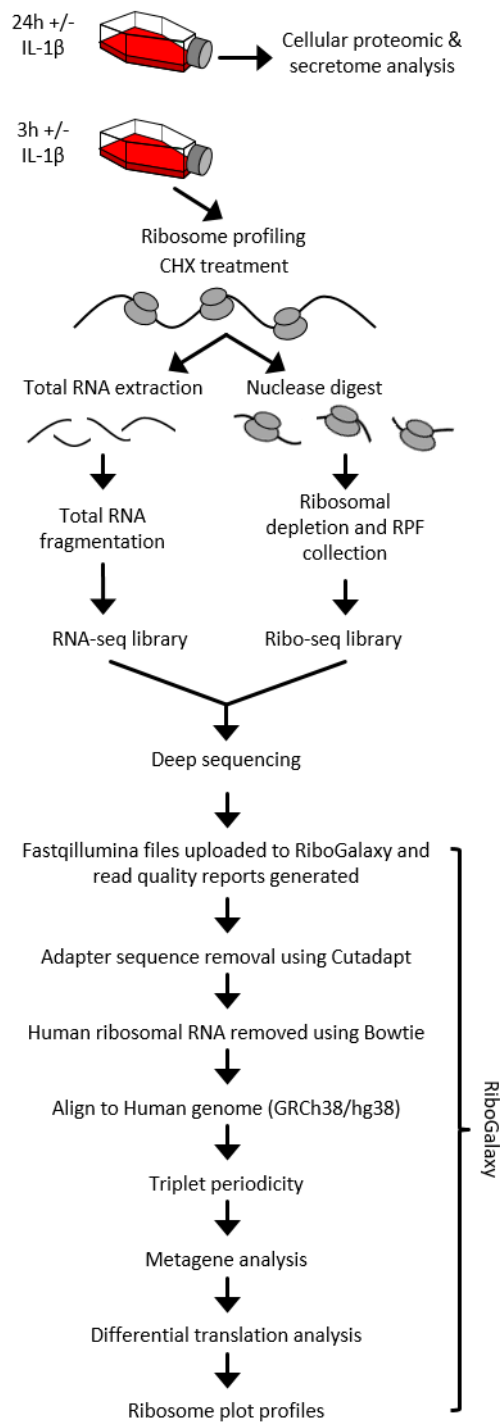

Fig. S1

**Supporting Information Figure S1. Extended ribosome profiling workflow detailing steps that were performed on the RiboGalaxy platform.** A full list of detailed parameters used in RiboGalaxy are described in Supporting Information Table S4.



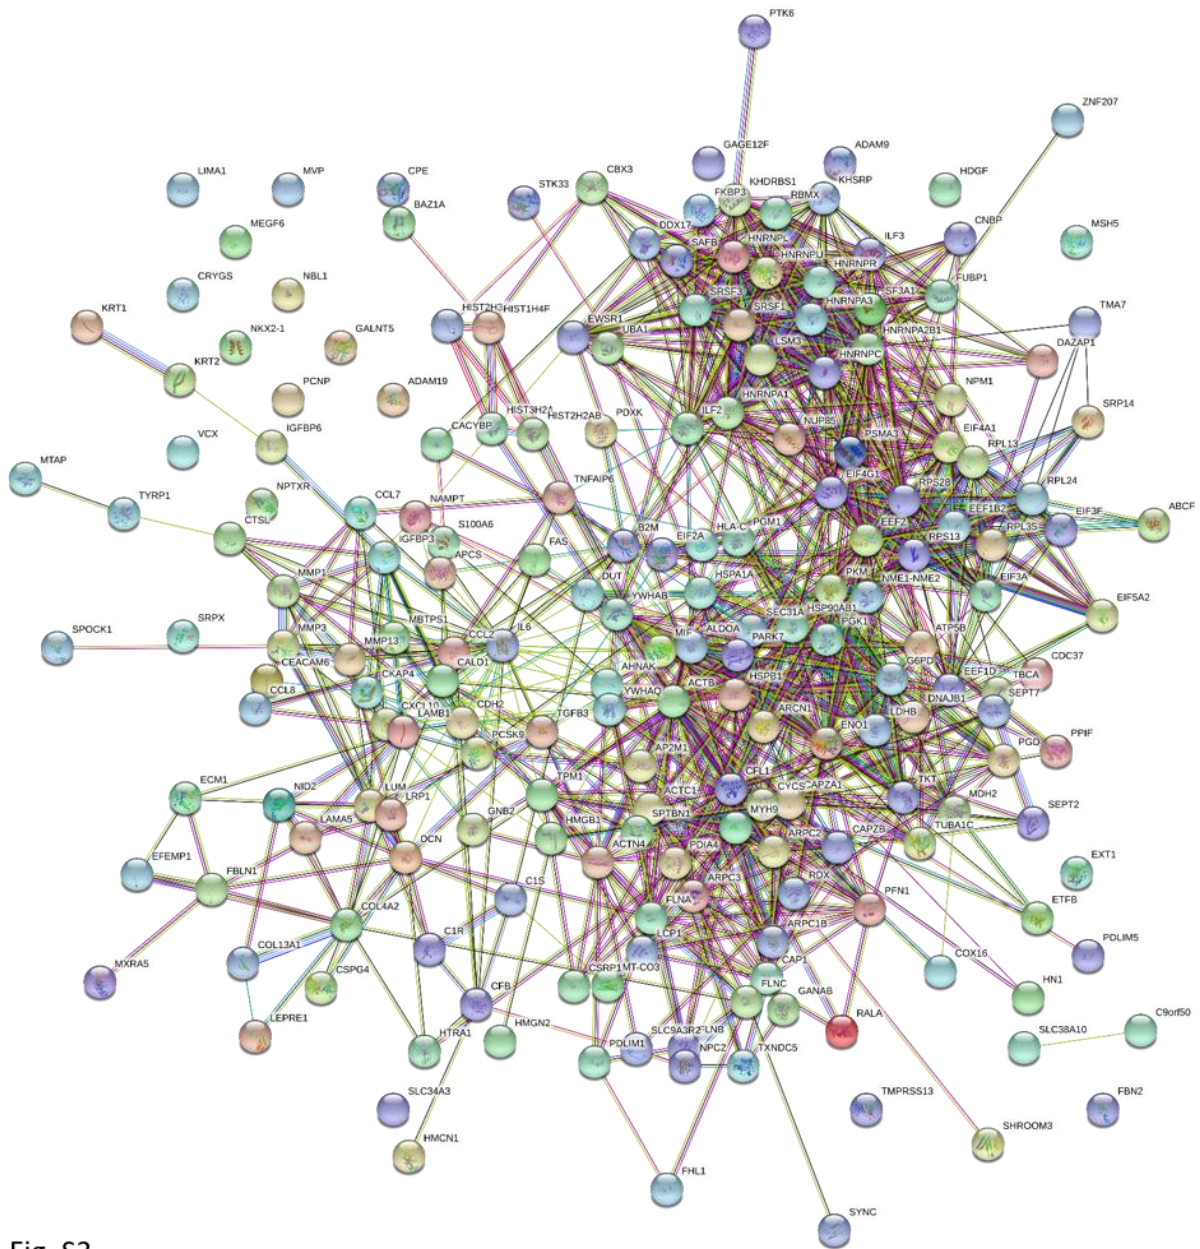

Fig. S3

**Supporting Information Figure S3. SW1353 STRING analysis of secretome data.** A larger version of the STRING network shown in Figure 2B, with the addition of transcript labels.

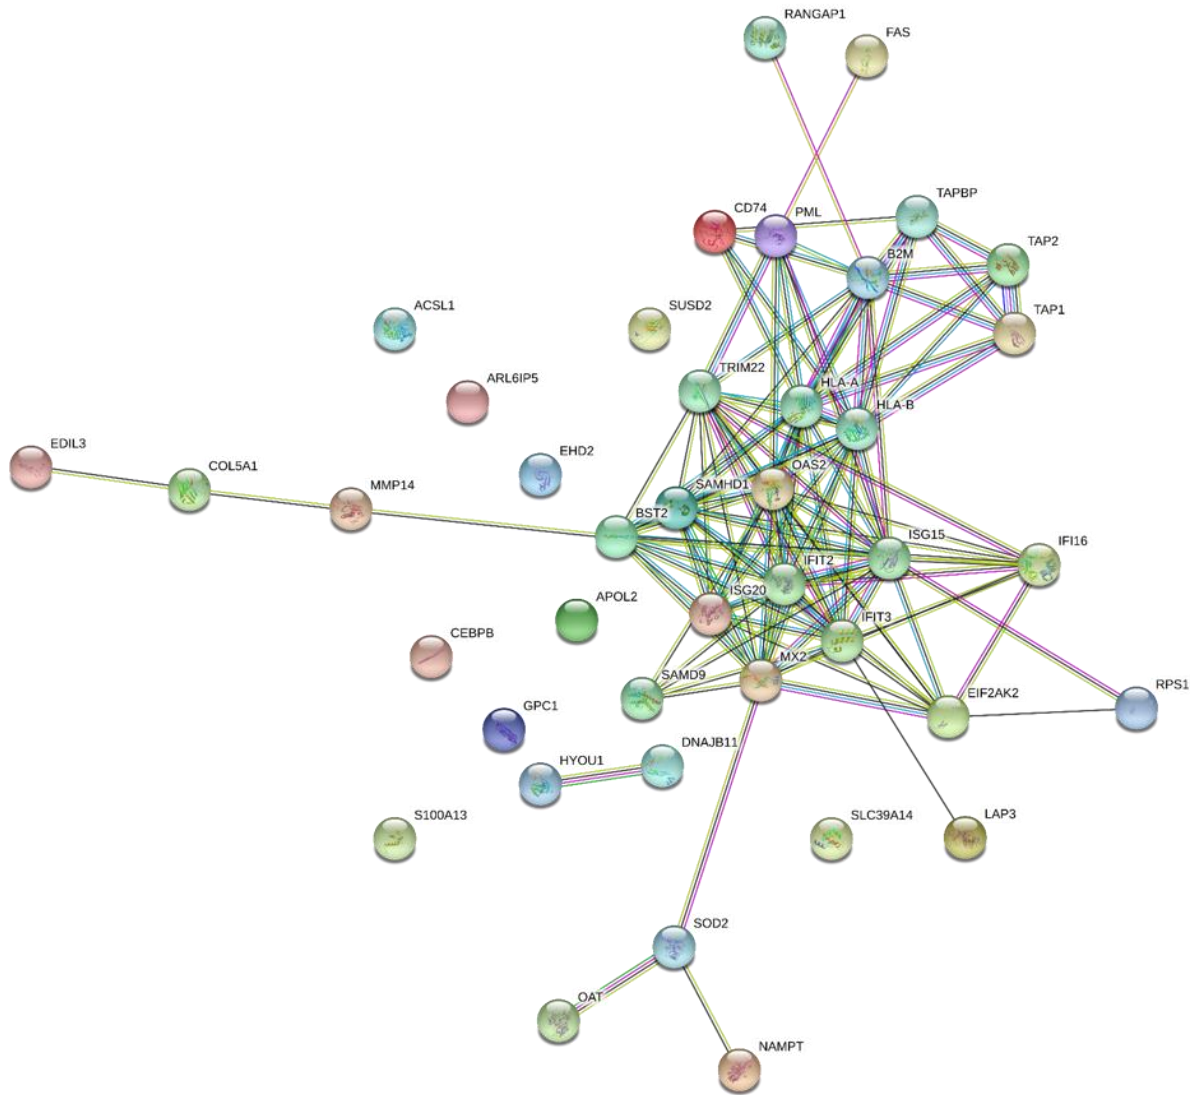

Fig. S4

**Supporting Information Figure S4. SW1353 STRING analysis of cellular proteomic data. A larger version of the STRING network shown in Figure 2C, with the addition of transcript labels.**
